# Supplementary material
Source: PubMed Central journal article supplement (PMC3800498)

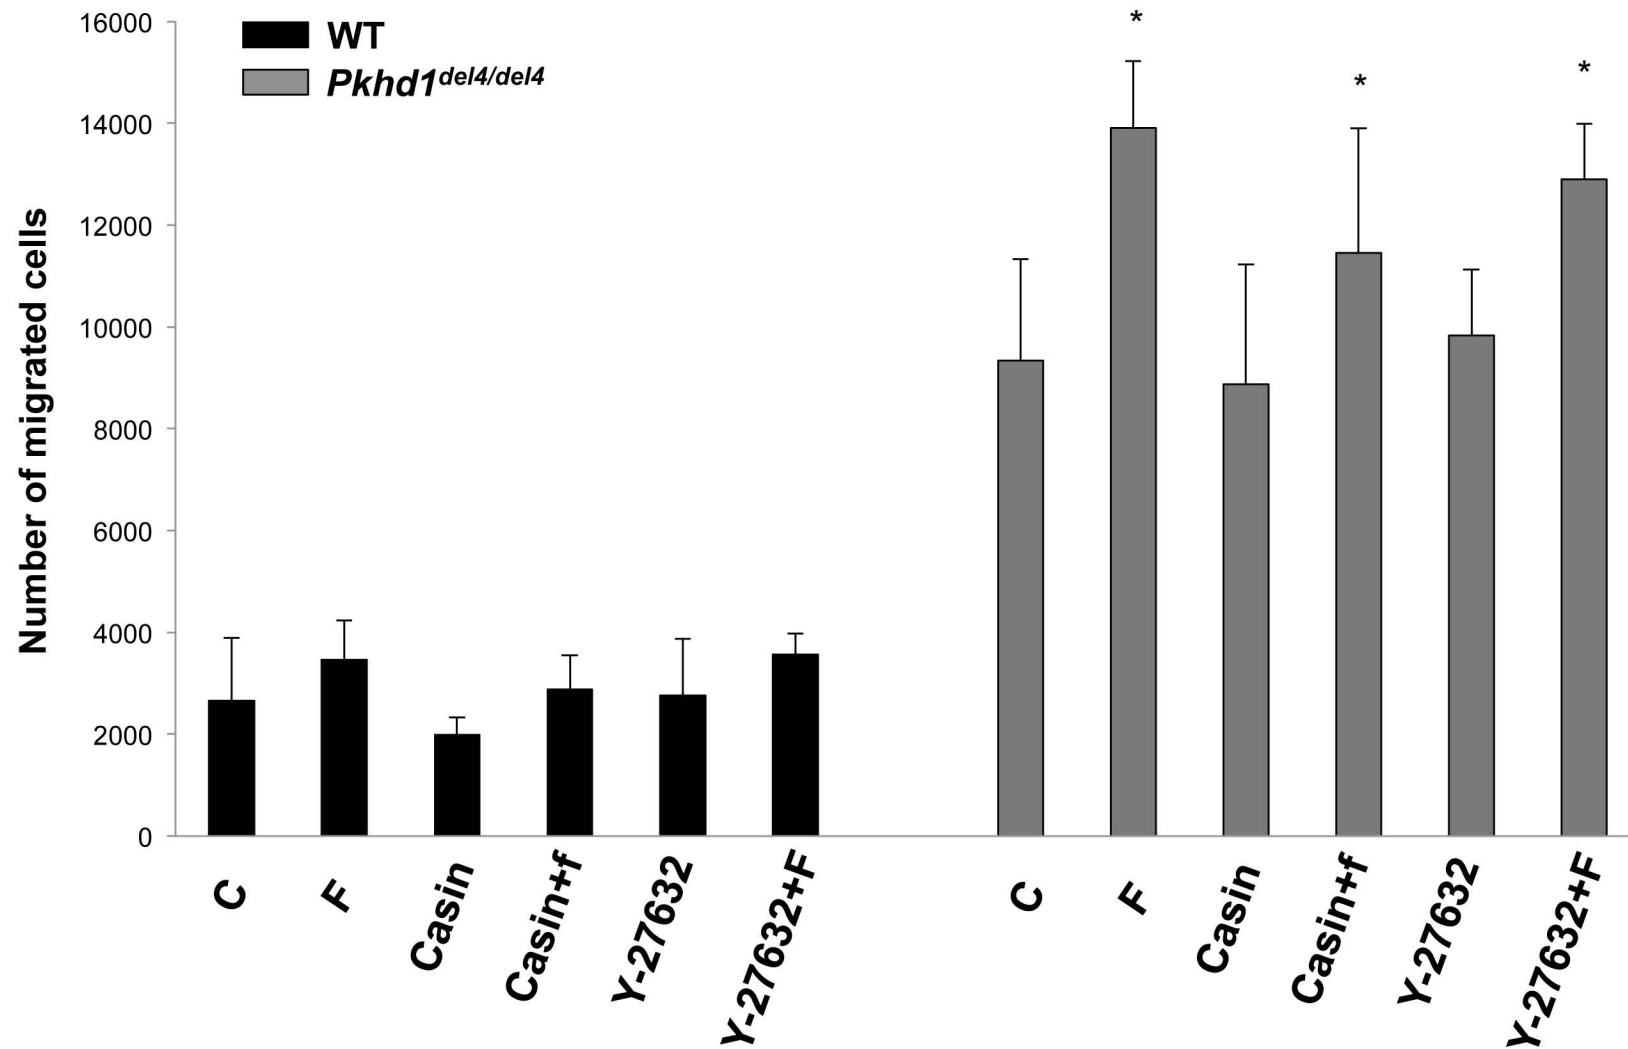

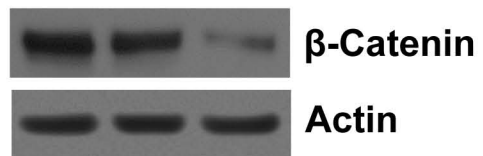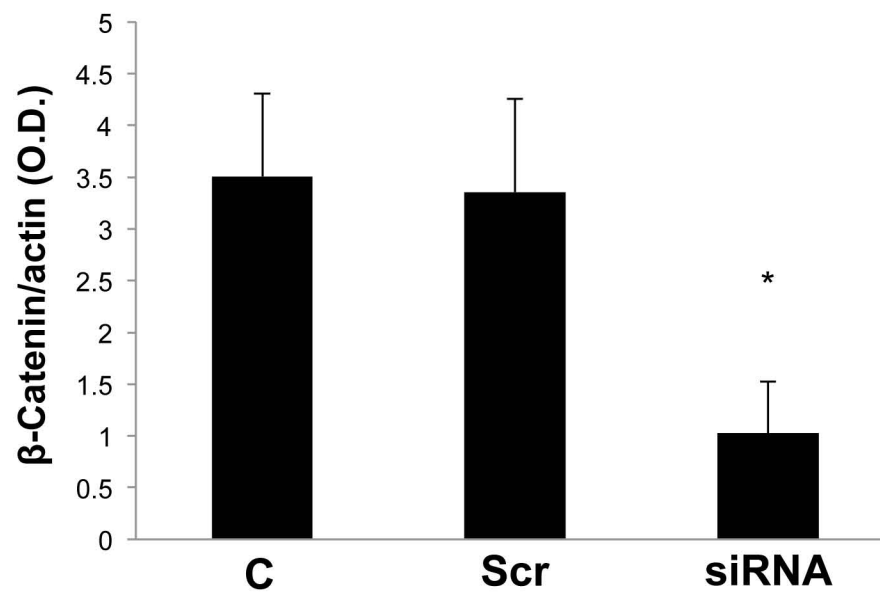

Suppl. Figure 3

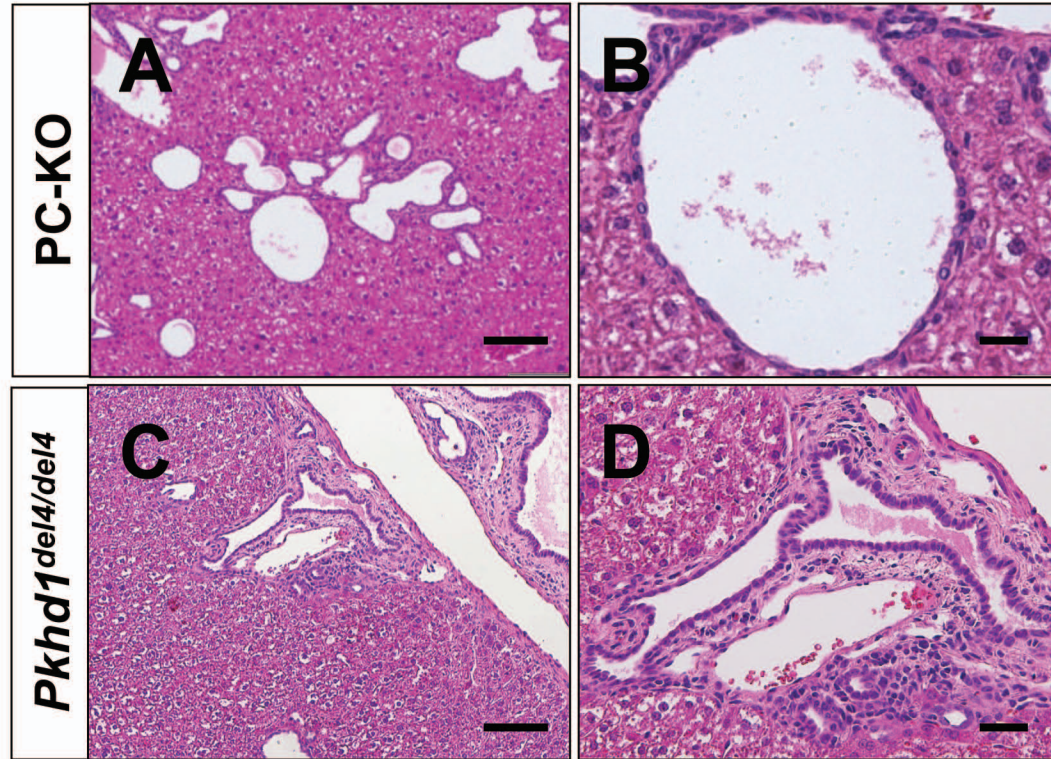

Supplement: NIHMS486852-supplement-Supp_Fig_S1-S3.pdf [file NIHMS486852-supplement-Supp_Fig_S1-S3.pdf]
